# Supplementary material for: Is there an occupational status gradient in the development of periodontal disease in Japanese workers? A 5-year prospective cohort study
Source: PubMed Central journal article supplement — J Epidemiol. 2016 Oct 27;27(2):69–74. doi: 10.1016/j.je.2016.09.002 (PMC5328729; doi:10.1016/j.je.2016.09.002), 2016-10-27
Supplement: je-27-069-s001.pdf [file je-27-069-s001.pdf]

**eTable 1.** Relative risk of classification of occupation for periodontal disease in male with 10 teeth or more

| Classification of occupation | Odds ratio (95% confidence interval) for periodontal disease |                          |                          |                          |                          |
|------------------------------|--------------------------------------------------------------|--------------------------|--------------------------|--------------------------|--------------------------|
|                              | Cases (N)                                                    | Crude                    | Age-adjusted             | Fully-adjusted*          | Fully-adjusted†          |
| <b>CPI=3 or 4</b>            |                                                              |                          |                          |                          |                          |
| Professional                 | 210 (791)                                                    | 1.00 (Reference)         | 1.00 (Reference)         | 1.00 (Reference)         | 1.00 (Reference)         |
| Managers                     | 201 (459)                                                    | <b>1.65 (1.36, 2.00)</b> | 1.15 (0.93, 1.41)        | 1.06 (0.86, 1.31)        | 1.07 (0.87, 1.32)        |
| Office workers               | 148 (446)                                                    | <b>1.25 (1.01, 1.54)</b> | 1.12 (0.91, 1.39)        | 1.06 (0.86, 1.32)        | 1.09 (0.88, 1.35)        |
| Skilled workers              | 127 (517)                                                    | 0.93 (0.74, 1.15)        | 0.95 (0.76, 1.18)        | 0.94 (0.75, 1.17)        | 0.94 (0.75, 1.17)        |
| Sales persons                | 109 (371)                                                    | 1.11 (0.88, 1.39)        | 1.10 (0.87, 1.38)        | 1.08 (0.85, 1.37)        | 1.03 (0.82, 1.30)        |
| Service occupations          | 37 (91)                                                      | <b>1.53 (1.08, 2.17)</b> | 1.35 (0.95, 1.92)        | 1.26 (0.88, 1.79)        | 1.27 (0.89, 1.81)        |
| Driver                       | 78 (197)                                                     | <b>1.49 (1.15, 1.93)</b> | <b>1.46 (1.12, 1.89)</b> | 1.27 (0.98, 1.66)        | 1.29 (0.99, 1.68)        |
| <b>CPI=4</b>                 |                                                              |                          |                          |                          |                          |
| Professional                 | 11 (791)                                                     | 1.00 (Reference)         | 1.00 (Reference)         | 1.00 (Reference)         | 1.00 (Reference)         |
| Managers                     | 19 (459)                                                     | <b>2.98 (1.42, 6.26)</b> | 1.63 (0.75, 3.54)        | 1.52 (0.68, 3.39)        | 1.42 (0.65, 3.10)        |
| Office workers               | 13 (446)                                                     | 2.10 (0.94, 4.68)        | 1.76 (0.79, 3.93)        | 1.85 (0.81, 4.25)        | 1.69 (0.75, 3.79)        |
| Skilled workers              | 18 (517)                                                     | <b>2.50 (1.18, 5.30)</b> | <b>2.47 (1.16, 5.24)</b> | <b>2.62 (1.20, 5.72)</b> | <b>2.37 (1.11, 5.05)</b> |
| Sales persons                | 13 (371)                                                     | <b>2.52 (1.13, 5.62)</b> | <b>2.49 (1.11, 5.55)</b> | <b>2.42 (1.06, 5.54)</b> | 2.14 (0.95, 4.79)        |
| Service occupations          | 2 (91)                                                       | 1.58 (0.35, 7.13)        | 1.30 (0.29, 5.87)        | 1.32 (0.29, 6.06)        | 1.24 (0.27, 5.61)        |
| Driver                       | 9 (197)                                                      | <b>3.29 (1.36, 7.93)</b> | <b>3.14 (1.30, 7.57)</b> | <b>2.73 (1.10, 6.78)</b> | <b>2.57 (1.06, 6.26)</b> |

CPI, community periodontal index.

\* Available-case analysis. Adjusted for age (+10), diabetes (yes or no), smoking (current, former, or never), drinking (everyday, sometimes, or never), and BMI (<18.5, 18.5-22.9, 23.0-27.5, or ≥27.5).

† Multiple imputation for missing data.

Bold font shows a statistically significant relative risk for periodontal disease.

**eTable 2.** Relative risk of classification of occupation for periodontal disease in female with 10 teeth or more

| Classification of occupation | Odds ratio (95% confidence interval) for periodontal disease |                           |                    |                           |                           |
|------------------------------|--------------------------------------------------------------|---------------------------|--------------------|---------------------------|---------------------------|
|                              | Cases (n)                                                    | Crude                     | Age-adjusted       | Fully-adjusted*           | Fully-adjusted†           |
| CPI=3 or 4                   |                                                              |                           |                    |                           |                           |
| Professional                 | 17 (54)                                                      | 1.00 (Reference)          | 1.00 (Reference)   | 1.00 (Reference)          | 1.00 (Reference)          |
| Managers                     | 9 (26)                                                       | 1.10 (0.49, 2.47)         | 0.73 (0.32, 1.66)  | 0.89 (0.38, 2.09)         | 0.78 (0.34, 1.81)         |
| Office workers               | 62 (323)                                                     | 0.62 (0.36, 1.06)         | 0.64 (0.38, 1.10)  | 0.65 (0.37, 1.14)         | 0.65 (0.38, 1.12)         |
| Skilled workers              | 30 (104)                                                     | 0.92 (0.51, 1.66)         | 0.77 (0.42, 1.40)  | 0.84 (0.45, 1.56)         | 0.82 (0.45, 1.51)         |
| Sales persons                | 9 (26)                                                       | 1.10 (0.49, 2.47)         | 1.08 (0.48, 2.41)  | 1.22 (0.53, 2.80)         | 1.08 (0.47, 2.45)         |
| Service occupations          | 7 (18)                                                       | 1.24 (0.51, 2.99)         | 0.94 (0.39, 2.29)  | 0.98 (0.40, 2.40)         | 0.96 (0.39, 2.35)         |
| CPI=4                        |                                                              |                           |                    |                           |                           |
| Professional                 | 3 (54)                                                       | 1.00 (Reference)          | 1.00 (Reference)   | 1.00 (Reference)          | 1.00 (Reference)          |
| Managers                     | 1 (26)                                                       | 0.69 (0.072, 6.66)        | 0.38 (0.037, 3.96) | 0.36 (0.031, 4.09)        | 0.35 (0.030, 3.99)        |
| Office workers               | 4 (323)                                                      | <b>0.22 (0.050, 1.00)</b> | 0.23 (0.051, 1.02) | <b>0.17 (0.033, 0.88)</b> | <b>0.17 (0.034, 0.89)</b> |
| Skilled workers              | 2 (104)                                                      | 0.35 (0.058, 2.07)        | 0.27 (0.044, 1.65) | 0.28 (0.044, 1.82)        | 0.29 (0.045, 1.85)        |
| Sales persons                | 1 (26)                                                       | 0.69 (0.072, 6.66)        | 0.65 (0.067, 6.27) | 0.62 (0.056, 6.92)        | 0.62 (0.058, 6.69)        |
| Service occupations          | 0 (18)                                                       | 0                         | 0                  | 0                         | 0                         |

CPI, community periodontal index.

\* Available-case analysis. Adjusted for age (+10), diabetes (yes or no), smoking (current, former, or never), drinking (everyday, sometimes, or never), and BMI (<18.5, 18.5-22.9, 23.0-27.5, or ≥27.5).

† Multiple imputation for missing data.

Bold font shows a statistically significant relative risk for periodontal disease.
